# Supplementary material for: Presynaptic APP levels and synaptic homeostasis are regulated by Akt phosphorylation of huntingtin
Source: eLife. 2020 May 26;9:e56371. doi: 10.7554/eLife.56371 (PMC7269668; doi:10.7554/eLife.56371)
Supplement: Figure 3—figure supplement 1—source data 1. [file elife-56371-fig3-figsupp1-data1.xlsx]

## Sheet: Feuil1
Table Analyzed	KHC total WT AA
Column B	AA
vs.	vs,
Column A	WT
Mann Whitney test
P value	0.9
Exact or approximate P value?	Exact
P value summary	ns
Significantly different? (P < 0.05)	No
One- or two-tailed P value?	Two-tailed
Sum of ranks in column A,B	11 , 10
Mann-Whitney U	4
Difference between medians
Median of column A	0,6849, n=3
Median of column B	0,6295, n=3
Difference: Actual	-0.05538
Difference: Hodges-Lehmann	-0.05538
