# Supplementary material for: Presynaptic APP levels and synaptic homeostasis are regulated by Akt phosphorylation of huntingtin
Source: eLife. 2020 May 26;9:e56371. doi: 10.7554/eLife.56371 (PMC7269668; doi:10.7554/eLife.56371)
Supplement: Figure 3—source data 1. [file elife-56371-fig3-data1.xlsx]

## Sheet: Feuil1
Anterograde speed
Table Analyzed	Anterograde Speed							Number of families	1
								Number of comparisons per family	3
ANOVA summary								Alpha	0.05
F	8.934
P value	0.0001							Tukey's multiple comparisons test	Mean Diff,	95% CI of diff,	Significant?	Summary
P value summary	***
Are differences among means statistically significant? (P < 0.05)	Yes							WT vs. AA	0.1116	-0,1426 to 0,3659	No	ns		A-B
R square	0.01288							WT vs. DD	-0.2972	-0,5269 to -0,06749	Yes	**		A-C
								AA vs. DD	-0.4088	-0,6518 to -0,1659	Yes	***		B-C
Brown-Forsythe test
F (DFn, DFd)	5,717 (2, 1369)
P value	0.0034							Test details	Mean 1	Mean 2	Mean Diff,	SE of diff,	n1	n2	q	DF
P value summary	**
Significantly different standard deviations? (P < 0.05)	Yes							WT vs. AA	2.874	2.762	0.1116	0.1084	448	369	1.457	1369
								WT vs. DD	2.874	3.171	-0.2972	0.0979	448	555	4.293	1369
Bartlett's test								AA vs. DD	2.762	3.171	-0.4088	0.1035	369	555	5.584	1369
Bartlett's statistic (corrected)	5.072
P value	0.0792
P value summary	ns
Significantly different standard deviations? (P < 0.05)	No
ANOVA table	SS	DF	MS	F (DFn, DFd)	P value
Treatment (between columns)	42.46	2	21.23	F (2, 1369) = 8,934	P = 0,0001
Residual (within columns)	3253	1369	2.376
Total	3295	1371
Data summary
Number of treatments (columns)	3
Number of values (total)	1372
retrograde speed
								Number of families	1
Table Analyzed	Retrograde Speed							Number of comparisons per family	3
								Alpha	0.05
ANOVA summary
F	5.297							Tukey's multiple comparisons test	Mean Diff,	95% CI of diff,	Significant?	Summary
P value	0.0052
P value summary	**							WT vs. AA	0.2437	0,03364 to 0,4538	Yes	*		A-B
Are differences among means statistically significant? (P < 0.05)	Yes							WT vs. DD	-0.02003	-0,2367 to 0,1967	No	ns		A-C
R square	0.0111							AA vs. DD	-0.2638	-0,4792 to -0,04829	Yes	*		B-C
Brown-Forsythe test
F (DFn, DFd)	4,815 (2, 944)							Test details	Mean 1	Mean 2	Mean Diff,	SE of diff,	n1	n2	q	DF
P value	0.0083
P value summary	**							WT vs. AA	-2.004	-2.248	0.2437	0.0895	323	331	3.851	944
Significantly different standard deviations? (P < 0.05)	Yes							WT vs. DD	-2.004	-1.984	-0.02003	0.09232	323	293	0.3068	944
								AA vs. DD	-2.248	-1.984	-0.2638	0.09179	331	293	4.064	944
Bartlett's test
Bartlett's statistic (corrected)	23.2
P value	< 0,0001
P value summary	****
Significantly different standard deviations? (P < 0.05)	Yes
ANOVA table	SS	DF	MS	F (DFn, DFd)	P value
Treatment (between columns)	13.87	2	6.936	F (2, 944) = 5,297	P = 0,0052
Residual (within columns)	1236	944	1.309
Total	1250	946
Data summary
Number of treatments (columns)	3
Number of values (total)	947
anterograde vesicles
Table Analyzed	Anterograde vesicle / axon							Number of families	1
								Number of comparisons per family	3
ANOVA summary								Alpha	0.05
F	2.22
P value	0.1123							Tukey's multiple comparisons test	Mean Diff,	95% CI of diff,	Significant?	Summary
P value summary	ns
Are differences among means statistically significant? (P < 0.05)	No							WT vs. AA	0.5792	-1,109 to 2,268	No	ns		A-B
R square	0.02971							WT vs. DD	-0.7621	-2,323 to 0,7989	No	ns		A-C
								AA vs. DD	-1.341	-2,870 to 0,1871	No	ns		B-C
Brown-Forsythe test
F (DFn, DFd)	0,2997 (2, 145)
P value	0.7415							Test details	Mean 1	Mean 2	Mean Diff,	SE of diff,	n1	n2	q	DF
P value summary	ns
Significantly different standard deviations? (P < 0.05)	No							WT vs. AA	5.618	5.039	0.5792	0.7131	41	44	1.149	145
								WT vs. DD	5.618	6.38	-0.7621	0.6592	41	63	1.635	145
Bartlett's test								AA vs. DD	5.039	6.38	-1.341	0.6454	44	63	2.939	145
Bartlett's statistic (corrected)	1.751
P value	0.4167
P value summary	ns
Significantly different standard deviations? (P < 0.05)	No
ANOVA table	SS	DF	MS	F (DFn, DFd)	P value
Treatment (between columns)	47.92	2	23.96	F (2, 145) = 2,220	P = 0,1123
Residual (within columns)	1565	145	10.79
Total	1613	147
Data summary
Number of treatments (columns)	3
Number of values (total)	148
Retrograde vesicle / axon
Table Analyzed	Retrograde vesicle / axon							Number of families	1
								Number of comparisons per family	3
ANOVA summary								Alpha	0.05
F	3.711
P value	0.0268							Tukey's multiple comparisons test	Mean Diff,	95% CI of diff,	Significant?	Summary
P value summary	*
Are differences among means statistically significant? (P < 0.05)	Yes							WT vs. AA	-0.1583	-1,413 to 1,097	No	ns		A-B
R square	0.04869							WT vs. DD	1.019	-0,1804 to 2,219	No	ns		A-C
								AA vs. DD	1.178	0,06401 to 2,291	Yes	*		B-C
Brown-Forsythe test
F (DFn, DFd)	3,580 (2, 145)
P value	0.0304							Test details	Mean 1	Mean 2	Mean Diff,	SE of diff,	n1	n2	q	DF
P value summary	*
Significantly different standard deviations? (P < 0.05)	Yes							WT vs. AA	4.238	4.397	-0.1583	0.5299	38	49	0.4225	145
								WT vs. DD	4.238	3.219	1.019	0.5067	38	61	2.845	145
Bartlett's test								AA vs. DD	4.397	3.219	1.178	0.4703	49	61	3.541	145
Bartlett's statistic (corrected)	7.373
P value	0.0251
P value summary	*
Significantly different standard deviations? (P < 0.05)	Yes
ANOVA table	SS	DF	MS	F (DFn, DFd)	P value
Treatment (between columns)	44.6	2	22.3	F (2, 145) = 3,711	P = 0,0268
Residual (within columns)	871.5	145	6.01
Total	916.1	147
Data summary
Number of treatments (columns)	3
Number of values (total)	148
anterograde distance
Table Analyzed	Anterograde distance							Number of families	1
								Number of comparisons per family	3
ANOVA summary								Alpha	0.05
F	15.64
P value	< 0,0001							Tukey's multiple comparisons test	Mean Diff,	95% CI of diff,	Significant?	Summary
P value summary	****
Are differences among means statistically significant? (P < 0.05)	Yes							WT vs. AA	2.773	-0,1072 to 5,653	No	ns		A-B
R square	0.0174							WT vs. DD	-4.632	-7,676 to -1,589	Yes	**		A-C
								AA vs. DD	-7.406	-10,53 to -4,286	Yes	****		B-C
Brown-Forsythe test
F (DFn, DFd)	10,34 (2, 1766)
P value	< 0,0001							Test details	Mean 1	Mean 2	Mean Diff,	SE of diff,	n1	n2	q	DF
P value summary	****
Significantly different standard deviations? (P < 0.05)	Yes							WT vs. AA	17.11	14.34	2.773	1.228	674	602	3.194	1766
								WT vs. DD	17.11	21.74	-4.632	1.298	674	493	5.049	1766
Bartlett's test								AA vs. DD	14.34	21.74	-7.406	1.33	602	493	7.874	1766
Bartlett's statistic (corrected)	16.38
P value	0.0003
P value summary	***
Significantly different standard deviations? (P < 0.05)	Yes
ANOVA table	SS	DF	MS	F (DFn, DFd)	P value
Treatment (between columns)	14996	2	7498	F (2, 1766) = 15,64	P < 0,0001
Residual (within columns)	846737	1766	479.5
Total	861733	1768
Data summary
Number of treatments (columns)	3
Number of values (total)	1769
retrograde distance
Table Analyzed	Retrograde distance							Number of families	1
								Number of comparisons per family	3
ANOVA summary								Alpha	0.05
F	7.978
P value	0.0004							Tukey's multiple comparisons test	Mean Diff,	95% CI of diff,	Significant?	Summary
P value summary	***
Are differences among means statistically significant? (P < 0.05)	Yes							WT vs. AA	3.782	1,375 to 6,188	Yes	***		A-B
R square	0.008954							WT vs. DD	0.2922	-2,251 to 2,835	No	ns		A-C
								AA vs. DD	-3.489	-6,096 to -0,8831	Yes	**		B-C
Brown-Forsythe test
F (DFn, DFd)	7,868 (2, 1766)
P value	0.0004							Test details	Mean 1	Mean 2	Mean Diff,	SE of diff,	n1	n2	q	DF
P value summary	***
Significantly different standard deviations? (P < 0.05)	Yes							WT vs. AA	-10.16	-13.94	3.782	1.026	674	602	5.213	1766
								WT vs. DD	-10.16	-10.45	0.2922	1.084	674	493	0.3812	1766
Bartlett's test								AA vs. DD	-13.94	-10.45	-3.489	1.111	602	493	4.441	1766
Bartlett's statistic (corrected)	13.92
P value	0.0009
P value summary	***
Significantly different standard deviations? (P < 0.05)	Yes
ANOVA table	SS	DF	MS	F (DFn, DFd)	P value
Treatment (between columns)	5339	2	2669	F (2, 1766) = 7,978	P = 0,0004
Residual (within columns)	590932	1766	334.6
Total	596271	1768
Data summary
Number of treatments (columns)	3
Number of values (total)	1769
directional net flux
Table Analyzed	directional net flux							Number of families	1
								Number of comparisons per family	3
ANOVA summary								Alpha	0.05
F	14.33
P value	< 0,0001							Tukey's multiple comparisons test	Mean Diff,	95% CI of diff,	Significant?	Summary
P value summary	****
Are differences among means statistically significant? (P < 0.05)	Yes							WT vs. AA	6.555	2,071 to 11,04	Yes	**		A-B
R square	0.01597							WT vs. DD	-4.34	-9,079 to 0,3991	No	ns		A-C
								AA vs. DD	-10.89	-15,75 to -6,038	Yes	****		B-C
Brown-Forsythe test
F (DFn, DFd)	2,560 (2, 1766)
P value	0.0776							Test details	Mean 1	Mean 2	Mean Diff,	SE of diff,	n1	n2	q	DF
P value summary	ns
Significantly different standard deviations? (P < 0.05)	No							WT vs. AA	6.954	0.399	6.555	1.912	674	602	4.849	1766
								WT vs. DD	6.954	11.29	-4.34	2.02	674	493	3.038	1766
Bartlett's test								AA vs. DD	0.399	11.29	-10.89	2.071	602	493	7.441	1766
Bartlett's statistic (corrected)	5.03
P value	0.0809
P value summary	ns
Significantly different standard deviations? (P < 0.05)	No
ANOVA table	SS	DF	MS	F (DFn, DFd)	P value
Treatment (between columns)	33308	2	16654	F (2, 1766) = 14,33	P < 0,0001
Residual (within columns)	2052000	1766	1162
Total	2086000	1768
Data summary
Number of treatments (columns)	3
Number of values (total)	1769
