# Supplementary material for: Presynaptic APP levels and synaptic homeostasis are regulated by Akt phosphorylation of huntingtin
Source: eLife. 2020 May 26;9:e56371. doi: 10.7554/eLife.56371 (PMC7269668; doi:10.7554/eLife.56371)
Supplement: Figure 3—source data 2. [file elife-56371-fig3-data2.xlsx]

## Sheet: Feuil1
Retrograde speed
Table Analyzed	Retrograde speed
							Number of families	1
ANOVA summary							Number of comparisons per family	3
F	0.7223						Alpha	0.05
P value	0.4858
P value summary	ns						Tukey's multiple comparisons test	Mean Diff,	95% CI of diff,	Significant?	Summary
Are differences among means statistically significant? (P < 0.05)	No
R square	0.0009043						WT vs. AA	-0.08344	-0,2464 to 0,07951	No	ns		A-B
							WT vs. DD	-0.03908	-0,2050 to 0,1268	No	ns		A-C
Brown-Forsythe test							AA vs. DD	0.04436	-0,1218 to 0,2106	No	ns		B-C
F (DFn, DFd)	0,8336 (2, 1596)
P value	0.4347
P value summary	ns						Test details	Mean 1	Mean 2	Mean Diff,	SE of diff,	n1	n2	q	DF
Significantly different standard deviations? (P < 0.05)	No
							WT vs. AA	-2.16	-2.077	-0.08344	0.06946	548	544	1.699	1596
Bartlett's test							WT vs. DD	-2.16	-2.121	-0.03908	0.07072	548	507	0.7815	1596
Bartlett's statistic (corrected)	3.239						AA vs. DD	-2.077	-2.121	0.04436	0.07084	544	507	0.8854	1596
P value	0.198
P value summary	ns
Significantly different standard deviations? (P < 0.05)	No
ANOVA table	SS	DF	MS	F (DFn, DFd)	P value
Treatment (between columns)	1.903	2	0.9513	F (2, 1596) = 0,7223	P = 0,4858
Residual (within columns)	2102	1596	1.317
Total	2104	1598
Data summary
Number of treatments (columns)	3
Number of values (total)	1599
anterograde speed
Table Analyzed	anterograde speed						Number of families	1
							Number of comparisons per family	3
ANOVA summary							Alpha	0.05
F	0.3178
P value	0.7278						Tukey's multiple comparisons test	Mean Diff,	95% CI of diff,	Significant?	Summary
P value summary	ns
Are differences among means statistically significant? (P < 0.05)	No						WT vs. AA	-0.0006564	-0,1768 to 0,1755	No	ns		A-B
R square	0.000277						WT vs. DD	0.05255	-0,1248 to 0,2299	No	ns		A-C
							AA vs. DD	0.0532	-0,1270 to 0,2334	No	ns		B-C
Brown-Forsythe test
F (DFn, DFd)	4,069 (2, 2294)
P value	0.0172						Test details	Mean 1	Mean 2	Mean Diff,	SE of diff,	n1	n2	q	DF
P value summary	*
Significantly different standard deviations? (P < 0.05)	Yes						WT vs. AA	2.938	2.939	-0.0006564	0.07512	806	755	0.01236	2294
							WT vs. DD	2.938	2.885	0.05255	0.07562	806	736	0.9827	2294
Bartlett's test							AA vs. DD	2.939	2.885	0.0532	0.07683	755	736	0.9794	2294
Bartlett's statistic (corrected)	4.456
P value	0.1078
P value summary	ns
Significantly different standard deviations? (P < 0.05)	No
ANOVA table	SS	DF	MS	F (DFn, DFd)	P value
Treatment (between columns)	1.398	2	0.699	F (2, 2294) = 0,3178	P = 0,7278
Residual (within columns)	5046	2294	2.2
Total	5048	2296
Data summary
Number of treatments (columns)	3
Number of values (total)	2297
retrograde distance
Table Analyzed	retrograde distance						Number of families	1
							Number of comparisons per family	3
ANOVA summary							Alpha	0.05
F	0.379
P value	0.6846						Tukey's multiple comparisons test	Mean Diff,	95% CI of diff,	Significant?	Summary
P value summary	ns
Are differences among means statistically significant? (P < 0.05)	No						WT vs. AA	-0.5232	-2,628 to 1,581	No	ns		A-B
R square	0.0002263						WT vs. DD	-0.7692	-2,896 to 1,357	No	ns		A-C
							AA vs. DD	-0.246	-2,392 to 1,900	No	ns		B-C
Brown-Forsythe test
F (DFn, DFd)	0,3790 (2, 3348)
P value	0.6846						Test details	Mean 1	Mean 2	Mean Diff,	SE of diff,	n1	n2	q	DF
P value summary	ns
Significantly different standard deviations? (P < 0.05)	No						WT vs. AA	-14.99	-14.47	-0.5232	0.8975	1161	1117	0.8244	3348
							WT vs. DD	-14.99	-14.23	-0.7692	0.9068	1161	1073	1.2	3348
Bartlett's test							AA vs. DD	-14.47	-14.23	-0.246	0.9154	1117	1073	0.3801	3348
Bartlett's statistic (corrected)	3.061
P value	0.2165
P value summary	ns
Significantly different standard deviations? (P < 0.05)	No
ANOVA table	SS	DF	MS	F (DFn, DFd)	P value
Treatment (between columns)	347.6	2	173.8	F (2, 3348) = 0,3790	P = 0,6846
Residual (within columns)	1535000	3348	458.6
Total	1536000	3350
Data summary
Number of treatments (columns)	3
Number of values (total)	3351
anterograde distance
Table Analyzed	anterograde distance						Number of families	1
							Number of comparisons per family	3
ANOVA summary							Alpha	0.05
F	0.04438
P value	0.9566						Tukey's multiple comparisons test	Mean Diff,	95% CI of diff,	Significant?	Summary
P value summary	ns
Are differences among means statistically significant? (P < 0.05)	No						WT vs. AA	0.08886	-2,643 to 2,821	No	ns		A-B
R square	2.655e-05						WT vs. DD	-0.2532	-3,016 to 2,510	No	ns		A-C
							AA vs. DD	-0.3421	-3,131 to 2,447	No	ns		B-C
Brown-Forsythe test
F (DFn, DFd)	0,5939 (2, 3343)
P value	0.5522						Test details	Mean 1	Mean 2	Mean Diff,	SE of diff,	n1	n2	q	DF
P value summary	ns
Significantly different standard deviations? (P < 0.05)	No						WT vs. AA	25.33	25.24	0.08886	1.165	1160	1117	0.1078	3343
							WT vs. DD	25.33	25.58	-0.2532	1.178	1160	1069	0.3038	3343
Bartlett's test							AA vs. DD	25.24	25.58	-0.3421	1.189	1117	1069	0.4067	3343
Bartlett's statistic (corrected)	2.309
P value	0.3152
P value summary	ns
Significantly different standard deviations? (P < 0.05)	No
ANOVA table	SS	DF	MS	F (DFn, DFd)	P value
Treatment (between columns)	68.57	2	34.29	F (2, 3343) = 0,04438	P = 0,9566
Residual (within columns)	2583000	3343	772.6
Total	2583000	3345
Data summary
Number of treatments (columns)	3
Number of values (total)	3346
anterograde vesicle/dendrite
Table Analyzed	anterograde vesicle/dendrite
							Number of families	1
ANOVA summary							Number of comparisons per family	3
F	4.656						Alpha	0.05
P value	0.0102
P value summary	*						Tukey's multiple comparisons test	Mean Diff,	95% CI of diff,	Significant?	Summary
Are differences among means statistically significant? (P < 0.05)	Yes
R square	0.02819						WT vs. AA	-2.061	-3,726 to -0,3962	Yes	*		A-B
							WT vs. DD	-1.463	-3,079 to 0,1533	No	ns		A-C
Brown-Forsythe test							AA vs. DD	0.5979	-1,114 to 2,310	No	ns		B-C
F (DFn, DFd)	1,931 (2, 321)
P value	0.1467
P value summary	ns						Test details	Mean 1	Mean 2	Mean Diff,	SE of diff,	n1	n2	q	DF
Significantly different standard deviations? (P < 0.05)	No
							WT vs. AA	7.171	9.232	-2.061	0.707	121	96	4.122	321
Bartlett's test							WT vs. DD	7.171	8.634	-1.463	0.6864	121	107	3.014	321
Bartlett's statistic (corrected)	13.46						AA vs. DD	9.232	8.634	0.5979	0.7272	96	107	1.163	321
P value	0.0012
P value summary	**
Significantly different standard deviations? (P < 0.05)	Yes
ANOVA table	SS	DF	MS	F (DFn, DFd)	P value
Treatment (between columns)	249.1	2	124.6	F (2, 321) = 4,656	P = 0,0102
Residual (within columns)	8589	321	26.76
Total	8838	323
Data summary
Number of treatments (columns)	3
Number of values (total)	324
retrograde vesicle
Table Analyzed	retrograde vesicle/dendrite						Number of families	1
							Number of comparisons per family	3
ANOVA summary							Alpha	0.05
F	3.529
P value	0.0305						Tukey's multiple comparisons test	Mean Diff,	95% CI of diff,	Significant?	Summary
P value summary	*
Are differences among means statistically significant? (P < 0.05)	Yes						WT vs. AA	-1.634	-3,120 to -0,1484	Yes	*		A-B
R square	0.02199						WT vs. DD	-1.057	-2,500 to 0,3859	No	ns		A-C
							AA vs. DD	0.5773	-0,9397 to 2,094	No	ns		B-C
Brown-Forsythe test
F (DFn, DFd)	2,619 (2, 314)
P value	0.0745						Test details	Mean 1	Mean 2	Mean Diff,	SE of diff,	n1	n2	q	DF
P value summary	ns
Significantly different standard deviations? (P < 0.05)	No						WT vs. AA	5.336	6.97	-1.634	0.6309	116	95	3.663	314
							WT vs. DD	5.336	6.393	-1.057	0.6127	116	106	2.44	314
Bartlett's test							AA vs. DD	6.97	6.393	0.5773	0.6442	95	106	1.267	314
Bartlett's statistic (corrected)	17.03
P value	0.0002
P value summary	***
Significantly different standard deviations? (P < 0.05)	Yes
ANOVA table	SS	DF	MS	F (DFn, DFd)	P value
Treatment (between columns)	146.8	2	73.38	F (2, 314) = 3,529	P = 0,0305
Residual (within columns)	6528	314	20.79
Total	6675	316
Data summary
Number of treatments (columns)	3
Number of values (total)	317
directional net flux
Table Analyzed	Directionality						Number of families	1
							Number of comparisons per family	3
ANOVA summary							Alpha	0.05
F	0.9978
P value	0.3698						Tukey's multiple comparisons test	Mean Diff,	95% CI of diff,	Significant?	Summary
P value summary	ns
Are differences among means statistically significant? (P < 0.05)	No						WT vs. AA	-2.516	-6,730 to 1,697	No	ns		A-B
R square	0.006217						WT vs. DD	-1.32	-5,400 to 2,759	No	ns		A-C
							AA vs. DD	1.196	-3,129 to 5,521	No	ns		B-C
Brown-Forsythe test
F (DFn, DFd)	1,054 (2, 319)
P value	0.3498						Test details	Mean 1	Mean 2	Mean Diff,	SE of diff,	n1	n2	q	DF
P value summary	ns
Significantly different standard deviations? (P < 0.05)	No						WT vs. AA	10.06	12.57	-2.516	1.789	120	95	1.989	319
							WT vs. DD	10.06	11.38	-1.32	1.733	120	107	1.078	319
Bartlett's test							AA vs. DD	12.57	11.38	1.196	1.837	95	107	0.9208	319
Bartlett's statistic (corrected)	8.163
P value	0.0169
P value summary	*
Significantly different standard deviations? (P < 0.05)	Yes
ANOVA table	SS	DF	MS	F (DFn, DFd)	P value
Treatment (between columns)	338.8	2	169.4	F (2, 319) = 0,9978	P = 0,3698
Residual (within columns)	54161	319	169.8
Total	54500	321
Data summary
Number of treatments (columns)	3
Number of values (total)	322
