# Supplementary material for: Presynaptic APP levels and synaptic homeostasis are regulated by Akt phosphorylation of huntingtin
Source: eLife. 2020 May 26;9:e56371. doi: 10.7554/eLife.56371 (PMC7269668; doi:10.7554/eLife.56371)
Supplement: Figure 4—source data 1. [file elife-56371-fig4-data1.xlsx]

## Sheet: Feuil1
Anterograde Speed
Table Analyzed	Anterograde Speed						Number of families	1
							Number of comparisons per family	15
ANOVA summary							Alpha	0.05
F	17.56
P value	< 0,0001						Tukey's multiple comparisons test	Mean Diff,	95% CI of diff,	Significant?	Summary
P value summary	****
Are differences among means statistically significant? (P < 0.05)	Yes						WT vs. WT CA	-0.5497	-0,8052 to -0,2941	Yes	****		A-B
R square	0.01869						WT vs. WT DN	0.06403	-0,1819 to 0,3099	No	ns		A-C
							WT vs. AA	0.02568	-0,2175 to 0,2689	No	ns		A-D
Brown-Forsythe test							WT vs. AA CA	0.08281	-0,1736 to 0,3393	No	ns		A-E
F (DFn, DFd)	2,353 (5, 4609)						WT vs. AA DN	0.1342	-0,1169 to 0,3853	No	ns		A-F
P value	0.0384						WT CA vs. WT DN	0.6137	0,3778 to 0,8497	Yes	****		B-C
P value summary	*						WT CA vs. AA	0.5754	0,3422 to 0,8085	Yes	****		B-D
Significantly different standard deviations? (P < 0.05)	Yes						WT CA vs. AA CA	0.6325	0,3856 to 0,8794	Yes	****		B-E
							WT CA vs. AA DN	0.6839	0,4425 to 0,9253	Yes	****		B-F
Bartlett's test							WT DN vs. AA	-0.03835	-0,2609 to 0,1842	No	ns		C-D
Bartlett's statistic (corrected)	8.551						WT DN vs. AA CA	0.01878	-0,2181 to 0,2557	No	ns		C-E
P value	0.1284						WT DN vs. AA DN	0.0702	-0,1609 to 0,3013	No	ns		C-F
P value summary	ns						AA vs. AA CA	0.05713	-0,1770 to 0,2913	No	ns		D-E
Significantly different standard deviations? (P < 0.05)	No						AA vs. AA DN	0.1085	-0,1197 to 0,3368	No	ns		D-F
							AA CA vs. AA DN	0.05142	-0,1909 to 0,2938	No	ns		E-F
ANOVA table	SS	DF	MS	F (DFn, DFd)	P value
Treatment (between columns)	236.6	5	47.33	F (5, 4609) = 17,56	P < 0,0001
Residual (within columns)	12422	4609	2.695				Test details	Mean 1	Mean 2	Mean Diff,	SE of diff,	n1	n2	q	DF
Total	12658	4614
							WT vs. WT CA	2.909	3.458	-0.5497	0.08964	625	724	8.673	4609
Data summary							WT vs. WT DN	2.909	2.845	0.06403	0.08625	625	862	1.05	4609
Number of treatments (columns)	6						WT vs. AA	2.909	2.883	0.02568	0.08531	625	909	0.4257	4609
Number of values (total)	4615						WT vs. AA CA	2.909	2.826	0.08281	0.08996	625	713	1.302	4609
							WT vs. AA DN	2.909	2.774	0.1342	0.08808	625	782	2.155	4609
							WT CA vs. WT DN	3.458	2.845	0.6137	0.08276	724	862	10.49	4609
							WT CA vs. AA	3.458	2.883	0.5754	0.08178	724	909	9.95	4609
							WT CA vs. AA CA	3.458	2.826	0.6325	0.08662	724	713	10.33	4609
							WT CA vs. AA DN	3.458	2.774	0.6839	0.08467	724	782	11.42	4609
							WT DN vs. AA	2.845	2.883	-0.03835	0.07805	862	909	0.6949	4609
							WT DN vs. AA CA	2.845	2.826	0.01878	0.08311	862	713	0.3196	4609
							WT DN vs. AA DN	2.845	2.774	0.0702	0.08107	862	782	1.224	4609
							AA vs. AA CA	2.883	2.826	0.05713	0.08213	909	713	0.9838	4609
							AA vs. AA DN	2.883	2.774	0.1085	0.08007	909	782	1.917	4609
							AA CA vs. AA DN	2.826	2.774	0.05142	0.08501	713	782	0.8554	4609
Retrograde Speed
Table Analyzed	Retrograde Speed						Number of families	1
							Number of comparisons per family	15
ANOVA summary							Alpha	0.05
F	5.549
P value	< 0,0001						Tukey's multiple comparisons test	Mean Diff,	95% CI of diff,	Significant?	Summary
P value summary	****
Are differences among means statistically significant? (P < 0.05)	Yes						WT vs. WT CA	0.1931	-0,03708 to 0,4232	No	ns		A-B
R square	0.008173						WT vs. WT DN	0.2782	0,07310 to 0,4833	Yes	**		A-C
							WT vs. AA	0.3198	0,1189 to 0,5208	Yes	****		A-D
Brown-Forsythe test							WT vs. AA CA	0.1539	-0,05893 to 0,3667	No	ns		A-E
F (DFn, DFd)	3,112 (5, 3367)						WT vs. AA DN	0.3028	0,09711 to 0,5085	Yes	***		A-F
P value	0.0083						WT CA vs. WT DN	0.0851	-0,1300 to 0,3002	No	ns		B-C
P value summary	**						WT CA vs. AA	0.1268	-0,08438 to 0,3379	No	ns		B-D
Significantly different standard deviations? (P < 0.05)	Yes						WT CA vs. AA CA	-0.03918	-0,2617 to 0,1833	No	ns		B-E
							WT CA vs. AA DN	0.1097	-0,1059 to 0,3254	No	ns		B-F
Bartlett's test							WT DN vs. AA	0.04166	-0,1418 to 0,2251	No	ns		C-D
Bartlett's statistic (corrected)	15.44						WT DN vs. AA CA	-0.1243	-0,3207 to 0,07214	No	ns		C-E
P value	0.0086						WT DN vs. AA DN	0.02463	-0,1640 to 0,2133	No	ns		C-F
P value summary	**						AA vs. AA CA	-0.1659	-0,3581 to 0,02616	No	ns		D-E
Significantly different standard deviations? (P < 0.05)	Yes						AA vs. AA DN	-0.01703	-0,2012 to 0,1671	No	ns		D-F
							AA CA vs. AA DN	0.1489	-0,04816 to 0,3460	No	ns		E-F
ANOVA table	SS	DF	MS	F (DFn, DFd)	P value
Treatment (between columns)	38.54	5	7.707	F (5, 3367) = 5,549	P < 0,0001
Residual (within columns)	4676	3367	1.389				Test details	Mean 1	Mean 2	Mean Diff,	SE of diff,	n1	n2	q	DF
Total	4715	3372
							WT vs. WT CA	-1.842	-2.035	0.1931	0.08072	463	395	3.383	3367
Data summary							WT vs. WT DN	-1.842	-2.12	0.2782	0.07193	463	639	5.47	3367
Number of treatments (columns)	6						WT vs. AA	-1.842	-2.162	0.3198	0.07048	463	706	6.418	3367
Number of values (total)	3373						WT vs. AA CA	-1.842	-1.996	0.1539	0.07464	463	540	2.916	3367
							WT vs. AA DN	-1.842	-2.145	0.3028	0.07214	463	630	5.936	3367
							WT CA vs. WT DN	-2.035	-2.12	0.0851	0.07543	395	639	1.596	3367
							WT CA vs. AA	-2.035	-2.162	0.1268	0.07405	395	706	2.421	3367
							WT CA vs. AA CA	-2.035	-1.996	-0.03918	0.07803	395	540	0.7102	3367
							WT CA vs. AA DN	-2.035	-2.145	0.1097	0.07564	395	630	2.052	3367
							WT DN vs. AA	-2.12	-2.162	0.04166	0.06435	639	706	0.9156	3367
							WT DN vs. AA CA	-2.12	-1.996	-0.1243	0.06889	639	540	2.551	3367
							WT DN vs. AA DN	-2.12	-2.145	0.02463	0.06617	639	630	0.5263	3367
							AA vs. AA CA	-2.162	-1.996	-0.1659	0.06737	706	540	3.483	3367
							AA vs. AA DN	-2.162	-2.145	-0.01703	0.06459	706	630	0.373	3367
							AA CA vs. AA DN	-1.996	-2.145	0.1489	0.06911	540	630	3.047	3367
directional net flux
Table Analyzed	directional net flux						Number of families	1
							Number of comparisons per family	15
ANOVA summary							Alpha	0.05
F	8.113
P value	< 0,0001						Tukey's multiple comparisons test	Mean Diff,	95% CI of diff,	Significant?	Summary
P value summary	****
Are differences among means statistically significant? (P < 0.05)	Yes						WT vs. WT CA	-4.989	-10,24 to 0,2633	No	ns		A-B
R square	0.005964						WT vs. WT DN	3.038	-1,931 to 8,006	No	ns		A-C
							WT vs. AA	3.313	-1,580 to 8,206	No	ns		A-D
Brown-Forsythe test							WT vs. AA CA	3.024	-2,154 to 8,203	No	ns		A-E
F (DFn, DFd)	0,5029 (5, 6761)						WT vs. AA DN	4.86	-0,1834 to 9,903	No	ns		A-F
P value	0.7743						WT CA vs. WT DN	8.027	3,134 to 12,92	Yes	****		B-C
P value summary	ns						WT CA vs. AA	8.302	3,486 to 13,12	Yes	****		B-D
Significantly different standard deviations? (P < 0.05)	No						WT CA vs. AA CA	8.014	2,907 to 13,12	Yes	***		B-E
							WT CA vs. AA DN	9.849	4,880 to 14,82	Yes	****		B-F
Bartlett's test							WT DN vs. AA	0.2752	-4,229 to 4,779	No	ns		C-D
Bartlett's statistic (corrected)	2.947						WT DN vs. AA CA	-0.01305	-4,827 to 4,800	No	ns		C-E
P value	0.7082						WT DN vs. AA DN	1.822	-2,845 to 6,489	No	ns		C-F
P value summary	ns						AA vs. AA CA	-0.2883	-5,024 to 4,447	No	ns		D-E
Significantly different standard deviations? (P < 0.05)	No						AA vs. AA DN	1.547	-3,040 to 6,134	No	ns		D-F
							AA CA vs. AA DN	1.835	-3,055 to 6,726	No	ns		E-F
ANOVA table	SS	DF	MS	F (DFn, DFd)	P value
Treatment (between columns)	66199	5	13240	F (5, 6761) = 8,113	P < 0,0001
Residual (within columns)	11030000	6761	1632				Test details	Mean 1	Mean 2	Mean Diff,	SE of diff,	n1	n2	q	DF
Total	11100000	6766
							WT vs. WT CA	11.14	16.12	-4.989	1.843	936	988	3.829	6761
Data summary							WT vs. WT DN	11.14	8.098	3.038	1.743	936	1261	2.465	6761
Number of treatments (columns)	6						WT vs. AA	11.14	7.822	3.313	1.716	936	1357	2.729	6761
Number of values (total)	6767						WT vs. AA CA	11.14	8.111	3.024	1.817	936	1048	2.354	6761
							WT vs. AA DN	11.14	6.275	4.86	1.769	936	1177	3.885	6761
							WT CA vs. WT DN	16.12	8.098	8.027	1.716	988	1261	6.614	6761
							WT CA vs. AA	16.12	7.822	8.302	1.69	988	1357	6.949	6761
							WT CA vs. AA CA	16.12	8.111	8.014	1.791	988	1048	6.326	6761
							WT CA vs. AA DN	16.12	6.275	9.849	1.743	988	1177	7.991	6761
							WT DN vs. AA	8.098	7.822	0.2752	1.58	1261	1357	0.2463	6761
							WT DN vs. AA CA	8.098	8.111	-0.01305	1.689	1261	1048	0.01093	6761
							WT DN vs. AA DN	8.098	6.275	1.822	1.637	1261	1177	1.574	6761
							AA vs. AA CA	7.822	8.111	-0.2883	1.661	1357	1048	0.2454	6761
							AA vs. AA DN	7.822	6.275	1.547	1.609	1357	1177	1.36	6761
							AA CA vs. AA DN	8.111	6.275	1.835	1.716	1048	1177	1.513	6761
