# Supplementary material for: Presynaptic APP levels and synaptic homeostasis are regulated by Akt phosphorylation of huntingtin
Source: eLife. 2020 May 26;9:e56371. doi: 10.7554/eLife.56371 (PMC7269668; doi:10.7554/eLife.56371)
Supplement: Figure 5—source data 1. [file elife-56371-fig5-data1.xlsx]

## Sheet: Feuil1
Table Analyzed	SEP-APP
Column B	S421A Htt
vs.	vs,
Column A	wt Htt
Unpaired t test
P value	0.0449
P value summary	*
Significantly different? (P < 0.05)	Yes
One- or two-tailed P value?	Two-tailed
t, df	t=2,039 df=77
How big is the difference?
Mean ± SEM of column A	73,62 ± 5,228, n=39
Mean ± SEM of column B	59,40 ± 4,629, n=40
Difference between means	-14,22 ± 6,973
95% confidence interval	-28,10 to -0,3302
R squared	0.05121
F test to compare variances
F,DFn, Dfd	1,244, 38, 39
P value	0.5007
P value summary	ns
Significantly different? (P < 0.05)	No
