# Supplementary material for: Presynaptic APP levels and synaptic homeostasis are regulated by Akt phosphorylation of huntingtin
Source: eLife. 2020 May 26;9:e56371. doi: 10.7554/eLife.56371 (PMC7269668; doi:10.7554/eLife.56371)
Supplement: Figure 5—source data 2. [file elife-56371-fig5-data2.xlsx]

## Sheet: Feuil1
Table Analyzed	APP somatic µCh		Table Analyzed	APP synaptic µCh
Column B	AA		Column D	AA
vs.	vs,		vs.	vs,
Column A	WT		Column C	WT
Mann Whitney test			Mann Whitney test
P value	0.5873		P value	0.0317
Exact or approximate P value?	Exact		Exact or approximate P value?	Exact
P value summary	ns		P value summary	*
Significantly different? (P < 0.05)	No		Significantly different? (P < 0.05)	Yes
One- or two-tailed P value?	Two-tailed		One- or two-tailed P value?	Two-tailed
Sum of ranks in column A,B	30,50 , 24,50		Sum of ranks in column C,D	38 , 17
Mann-Whitney U	9.5		Mann-Whitney U	2
Difference between medians			Difference between medians
Median of column A	1,690, n=5		Median of column C	2,750, n=5
Median of column B	1,320, n=5		Median of column D	2,160, n=5
Difference: Actual	-0.37		Difference: Actual	-0.59
Difference: Hodges-Lehmann	-0.37		Difference: Hodges-Lehmann	-1.1
