# Supplementary material for: Presynaptic APP levels and synaptic homeostasis are regulated by Akt phosphorylation of huntingtin
Source: eLife. 2020 May 26;9:e56371. doi: 10.7554/eLife.56371 (PMC7269668; doi:10.7554/eLife.56371)
Supplement: Figure 5—source data 3. [file elife-56371-fig5-data3.xlsx]

## Sheet: Feuil1
Non PSD Fraction				PSD Fraction
Table Analyzed	Presynaptic APP			Table Analyzed	Postsynaptic APP
Column B	AA			Column B	AA
vs.	vs,			vs.	vs,
Column A	WT			Column A	WT
Mann Whitney test				Mann Whitney test
P value	0.0159			P value	0.4127
Exact or approximate P value?	Exact			Exact or approximate P value?	Exact
P value summary	*			P value summary	ns
Significantly different? (P < 0.05)	Yes			Significantly different? (P < 0.05)	No
One- or two-tailed P value?	Two-tailed			One- or two-tailed P value?	Two-tailed
Sum of ranks in column A,B	39 , 16			Sum of ranks in column A,B	23 , 32
Mann-Whitney U	1			Mann-Whitney U	8
Difference between medians				Difference between medians
Median of column A	1,240, n=5			Median of column A	0,9000, n=5
Median of column B	0,9400, n=5			Median of column B	1,130, n=5
Difference: Actual	-0.3			Difference: Actual	0.23
Difference: Hodges-Lehmann	-0.22			Difference: Hodges-Lehmann	0.18
