# Supplementary material for: Presynaptic APP levels and synaptic homeostasis are regulated by Akt phosphorylation of huntingtin
Source: eLife. 2020 May 26;9:e56371. doi: 10.7554/eLife.56371 (PMC7269668; doi:10.7554/eLife.56371)
Supplement: Figure 6—figure supplement 1—source data 1. [file elife-56371-fig6-figsupp1-data1.xlsx]

## Sheet: Feuil1
Fig S3A OPEN FIELD
Table Analyzed	Distance moved
Column A	WT
vs	vs
Column B	HTTSA
Unpaired t test
P value	0.1528
P value summary	ns
Are means signif. different? (P < 0.05)	No
One- or two-tailed P value?	Two-tailed
t, df	t=1,484 df=21
How big is the difference?
Mean ± SEM of column A	28,23 ± 2,121 N=11
Mean ± SEM of column B	23,85 ± 2,045 N=12
Difference between means	4,372 ± 2,947
95% confidence interval	-1,758 to 10,50
R square	0.09486
F test to compare variances
F,DFn, Dfd	1,014, 11, 10
P value	0.9903
P value summary	ns
Are variances significantly different?	No
