# Supplementary material for: Presynaptic APP levels and synaptic homeostasis are regulated by Akt phosphorylation of huntingtin
Source: eLife. 2020 May 26;9:e56371. doi: 10.7554/eLife.56371 (PMC7269668; doi:10.7554/eLife.56371)
Supplement: Figure 6—figure supplement 1—source data 2. [file elife-56371-fig6-figsupp1-data2.xlsx]

## Sheet: Feuil1
FigS3B Ratio
Table Analyzed	Ratio Periph/center
Column A	WT
vs	vs
Column B	HTTSA
Unpaired t test
P value	0.3235
P value summary	ns
Are means signif. different? (P < 0.05)	No
One- or two-tailed P value?	Two-tailed
t, df	t=1,011 df=21
How big is the difference?
Mean ± SEM of column A	5,636 ± 0,5439 N=11
Mean ± SEM of column B	7,500 ± 1,690 N=12
Difference between means	-1,864 ± 1,843
95% confidence interval	-5,698 to 1,971
R square	0.04641
F test to compare variances
F,DFn, Dfd	10,53, 11, 10
P value	0.0008
P value summary	***
Are variances significantly different?	Yes
