# Supplementary material for: Presynaptic APP levels and synaptic homeostasis are regulated by Akt phosphorylation of huntingtin
Source: eLife. 2020 May 26;9:e56371. doi: 10.7554/eLife.56371 (PMC7269668; doi:10.7554/eLife.56371)
Supplement: Figure 6—figure supplement 1—source data 3. [file elife-56371-fig6-figsupp1-data3.xlsx]

## Sheet: Feuil1
FigS3C Grip Force
Table Analyzed	Grip test
Column A	WT
vs	vs
Column B	HTTSA
Unpaired t test
P value	0.9561
P value summary	ns
Are means signif. different? (P < 0.05)	No
One- or two-tailed P value?	Two-tailed
t, df	t=0,05574 df=21
How big is the difference?
Mean ± SEM of column A	116,4 ± 7,915 N=11
Mean ± SEM of column B	115,9 ± 2,925 N=12
Difference between means	0,4547 ± 8,158
95% confidence interval	-16,51 to 17,42
R square	0.0001479
F test to compare variances
F,DFn, Dfd	6,710, 10, 11
P value	0.0041
P value summary	**
Are variances significantly different?	Yes
