# Supplementary material for: Presynaptic APP levels and synaptic homeostasis are regulated by Akt phosphorylation of huntingtin
Source: eLife. 2020 May 26;9:e56371. doi: 10.7554/eLife.56371 (PMC7269668; doi:10.7554/eLife.56371)
Supplement: Figure 6—figure supplement 1—source data 4. [file elife-56371-fig6-figsupp1-data4.xlsx]

## Sheet: Feuil1
FigS3D EPM
Table Analyzed	EPM % time open arm
Column A	WT
vs	vs
Column B	HTTSA
Unpaired t test
P value	0.1564
P value summary	ns
Are means signif. different? (P < 0.05)	No
One- or two-tailed P value?	Two-tailed
t, df	t=1,470 df=21
How big is the difference?
Mean ± SEM of column A	17,64 ± 4,241 N=11
Mean ± SEM of column B	10,42 ± 2,653 N=12
Difference between means	7,220 ± 4,912
95% confidence interval	-2,996 to 17,44
R square	0.09329
F test to compare variances
F,DFn, Dfd	2,343, 10, 11
P value	0.1786
P value summary	ns
Are variances significantly different?	No
