# Supplementary material for: Presynaptic APP levels and synaptic homeostasis are regulated by Akt phosphorylation of huntingtin
Source: eLife. 2020 May 26;9:e56371. doi: 10.7554/eLife.56371 (PMC7269668; doi:10.7554/eLife.56371)
Supplement: Figure 6—source data 1. [file elife-56371-fig6-data1.xlsx]

## Sheet: Feuil1
	brain
	Table Analyzed	Total Brain
	Column A	Wt
	vs.	vs,
	Column B	S421A
	Mann Whitney test
	P value	0.0286
	Exact or approximate P value?	Exact
	P value summary	*
	Significantly different? (P < 0.05)	Yes
	One- or two-tailed P value?	Two-tailed
	Sum of ranks in column A,B	10 , 26
	Mann-Whitney U	0
	Difference between medians
	Median of column A	441,8, n=4
	Median of column B	463,0, n=4
	Difference: Actual	-21.22
	Difference: Hodges-Lehmann	-21.22
	Cortex
	Table Analyzed	Cortex
	Column A	Wt
	vs.	vs,
	Column B	S421A
	Mann Whitney test
	P value	0.0286
	Exact or approximate P value?	Exact
	P value summary	*
	Significantly different? (P < 0.05)	Yes
	One- or two-tailed P value?	Two-tailed
	Sum of ranks in column A,B	10 , 26
	Mann-Whitney U	0
	Difference between medians
	Median of column A	135,5, n=4
	Median of column B	139,5, n=4
	Difference: Actual	-4.01
	Difference: Hodges-Lehmann	-5.22
	Hippocampus
	Table Analyzed	Hippocampe
	Column A	Wt
	vs.	vs,
	Column B	S421A
	Mann Whitney test
	P value	0.0286
	Exact or approximate P value?	Exact
	P value summary	*
	Significantly different? (P < 0.05)	Yes
	One- or two-tailed P value?	Two-tailed
	Sum of ranks in column A,B	10 , 26
	Mann-Whitney U	0
	Difference between medians
	Median of column A	21,93, n=4
	Median of column B	23,98, n=4
	Difference: Actual	-2.045
	Difference: Hodges-Lehmann	-2.045
	Striatum
	Table Analyzed	striatum
	Column A	Wt
	vs.	vs,
	Column B	S421A
	Mann Whitney test
	P value	0.4857
	Exact or approximate P value?	Exact
	P value summary	ns
	Significantly different? (P < 0.05)	No
	One- or two-tailed P value?	Two-tailed
	Sum of ranks in column A,B	15 , 21
	Mann-Whitney U	5
	Difference between medians
	Median of column A	19,80, n=4
	Median of column B	19,99, n=4
	Difference: Actual	-0.19
	Difference: Hodges-Lehmann	-0.29
