# Supplementary material for: Presynaptic APP levels and synaptic homeostasis are regulated by Akt phosphorylation of huntingtin
Source: eLife. 2020 May 26;9:e56371. doi: 10.7554/eLife.56371 (PMC7269668; doi:10.7554/eLife.56371)
Supplement: Figure 6—source data 2. [file elife-56371-fig6-data2.xlsx]

## Sheet: Feuil1
synapse number				spine size
Table Analyzed	syn number			Table Analyzed	spine size
Column B	AA			Column B	AA
vs.	vs,			vs.	vs,
Column A	WT			Column A	WT
Unpaired t test				Unpaired t test
P value	0.0048			P value	0.9774
P value summary	**			P value summary	ns
Significantly different? (P < 0.05)	Yes			Significantly different? (P < 0.05)	No
One- or two-tailed P value?	Two-tailed			One- or two-tailed P value?	Two-tailed
t, df	t=2,837 df=335			t, df	t=0,02831 df=441
How big is the difference?				How big is the difference?
Mean ± SEM of column A	20,21 ± 0,6063, n=134			Mean ± SEM of column A	185886 ± 9420, n=225
Mean ± SEM of column B	22,66 ± 0,5752, n=203			Mean ± SEM of column B	185523 ± 8642, n=218
Difference between means	2,447 ± 0,8625			Difference between means	-362,5 ± 12804
95% confidence interval	0,7500 to 4,143			95% confidence interval	-25526 to 24801
R squared	0.02346			R squared	1.817e-06
F test to compare variances				F test to compare variances
F,DFn, Dfd	1,363, 202, 133			F,DFn, Dfd	1,226, 224, 217
P value	0.0543			P value	0.131
P value summary	ns			P value summary	ns
Significantly different? (P < 0.05)	No			Significantly different? (P < 0.05)	No
