# Supplementary material for: Presynaptic APP levels and synaptic homeostasis are regulated by Akt phosphorylation of huntingtin
Source: eLife. 2020 May 26;9:e56371. doi: 10.7554/eLife.56371 (PMC7269668; doi:10.7554/eLife.56371)
Supplement: Figure 7—source data 1. [file elife-56371-fig7-data1.xlsx]

## Sheet: Feuil1
synaptic contacts
Table Analyzed	WT-AA
Table Analyzed	WT AAnormalized
Column B	HTTSA
vs.	vs,
Column A	wt
Unpaired t test
P value	< 0,0001
P value summary	****
Significantly different? (P < 0.05)	Yes
One- or two-tailed P value?	Two-tailed
t, df	t=11,12 df=174
How big is the difference?
Mean ± SEM of column A	100,0 ± 3,430, n=85
Mean ± SEM of column B	154,3 ± 3,468, n=91
Difference between means	54,31 ± 4,885
95% confidence interval	44,67 to 63,95
R squared	0.4153
F test to compare variances
F,DFn, Dfd	1,095, 90, 84
P value	0.6759
P value summary	ns
Significantly different? (P < 0.05)	No
