# Supplementary material for: Presynaptic APP levels and synaptic homeostasis are regulated by Akt phosphorylation of huntingtin
Source: eLife. 2020 May 26;9:e56371. doi: 10.7554/eLife.56371 (PMC7269668; doi:10.7554/eLife.56371)
Supplement: Figure 7—source data 2. [file elife-56371-fig7-data2.xlsx]

## Sheet: Feuil1
synaptic contacts
	WT + mcherry	WT + APP mcherry	HTTSA + APP mCherry
Number of values	75	59	71
Minimum	43.6	36.23	48.85
25% Percentile	68.6	55.7	79.72
Median	101.6	69.74	90.68
75% Percentile	128	89.1	112.3
Maximum	164.4	139.9	151.3
Mean	100	75.42	94.36
Std. Deviation	32.18	26.26	25.21
Std. Error of Mean	3.716	3.419	2.992
Lower 95% CI of mean	92.6	68.58	88.39
Upper 95% CI of mean	107.4	82.26	100.3
Shapiro-Wilk normality test
W	0.9634	0.944	0.9674
P value	0.029	0.0089	0.0618
Passed normality test (alpha=0.05)?	No	No	Yes
P value summary	*	**	ns
Sum	7500	4450	6699
Number of groups	3
Kruskal-Wallis statistic	23.33
Data summary
Number of treatments (columns)	3
Number of values (total)	205
Number of families	1
Number of comparisons per family	3
Alpha	0.05
Dunn's multiple comparisons test	Mean rank diff,	Significant?	Summary
WT + mcherry vs. WT + APP mcherry	47.38	Yes	****		A-B
WT + mcherry vs. HTTSA + APP mCherry	7.75	No	ns		A-C
WT + APP mcherry vs. HTTSA + APP mCherry	-39.63	Yes	***		B-C
Test details	Mean rank 1	Mean rank 2	Mean rank diff,	n1	n2
WT + mcherry vs. WT + APP mcherry	119.3	71.94	47.38	75	59
WT + mcherry vs. HTTSA + APP mCherry	119.3	111.6	7.75	75	71
WT + APP mcherry vs. HTTSA + APP mCherry	71.94	111.6	-39.63	59	71
