# Supplementary material for: Presynaptic APP levels and synaptic homeostasis are regulated by Akt phosphorylation of huntingtin
Source: eLife. 2020 May 26;9:e56371. doi: 10.7554/eLife.56371 (PMC7269668; doi:10.7554/eLife.56371)
Supplement: Figure 7—source data 3. [file elife-56371-fig7-data3.xlsx]

## Sheet: Feuil1
	synaptic contacts
		wt HTT + mCherry	HTTSA + mCherry
	Number of values	132	130
	Minimum	13.26	23.67
	25% Percentile	66.4	95.7
	Median	99.36	126.6
	75% Percentile	127.9	148.1
	Maximum	242.9	256.1
	Mean	99.96	123.9
	Std. Deviation	47.16	44.15
	Std. Error of Mean	4.105	3.872
	Lower 95% CI of mean	91.84	116.3
	Upper 95% CI of mean	108.1	131.6
	Shapiro-Wilk normality test
	W	0.9792	0.9839
	P value	0.0406	0.1276
	Passed normality test (alpha=0.05)?	No	Yes
	P value summary	*	ns
	Sum	13195	16109
	Table Analyzed	HT WT or HTT SA transduction + mcherry in percentage
	Column B	HTTSA + mCherry
	vs.	vs,
	Column A	wt HTT + mCherry
	Mann Whitney test
	P value	< 0,0001
	Exact or approximate P value?	Approximate
	P value summary	****
	Significantly different? (P < 0.05)	Yes
	One- or two-tailed P value?	Two-tailed
	Sum of ranks in column A,B	14667 , 19786
	Mann-Whitney U	5889
	Difference between medians
	Median of column A	99,36, n=132
	Median of column B	126,6, n=130
	Difference: Actual	27.25
	Difference: Hodges-Lehmann	25.45
