# Supplementary material for: Presynaptic APP levels and synaptic homeostasis are regulated by Akt phosphorylation of huntingtin
Source: eLife. 2020 May 26;9:e56371. doi: 10.7554/eLife.56371 (PMC7269668; doi:10.7554/eLife.56371)
Supplement: Figure 7—source data 4. [file elife-56371-fig7-data4.xlsx]

## Sheet: Feuil1
	synaptic contacts
		wt HTT + mCherry	wt HTT + APP mCherry	HTTSA + APP mCherry
	Number of values	132	134	136
	Minimum	13.26	15.63	24.68
	25% Percentile	66.4	49.68	63.57
	Median	99.36	67.7	90.29
	75% Percentile	127.9	100.3	107.4
	Maximum	242.9	177.5	193.8
	Mean	99.96	76.21	88.86
	Std. Deviation	47.16	34.88	32.72
	Std. Error of Mean	4.105	3.013	2.806
	Lower 95% CI of mean	91.84	70.25	83.31
	Upper 95% CI of mean	108.1	82.17	94.41
	Shapiro-Wilk normality test
	W	0.9792	0.9628	0.9796
	P value	0.0406	0.001	0.0389
	Passed normality test (alpha=0.05)?	No	No	No
	P value summary	*	**	*
	Sum	13195	10212	12085
	Table Analyzed	HTT SA + APP transduction in percentage
	Kruskal-Wallis test
	P value	< 0,0001
	Exact or approximate P value?	Approximate
	P value summary	****
	Do the medians vary signif. (P < 0.05)	Yes
	Number of groups	3
	Kruskal-Wallis statistic	22.21
	Data summary
	Number of treatments (columns)	3
	Number of values (total)	402
	Number of families	1
	Number of comparisons per family	3
	Alpha	0.05
	Dunn's multiple comparisons test	Mean rank diff,	Significant?	Summary	Adjusted P Value
	wt HTT + mCherry vs. wt HTT + APP mCherry	66.17	Yes	****	< 0,0001	A-B
	wt HTT + mCherry vs. HTTSA + APP mCherry	23.5	No	ns	0.2936	A-C
	wt HTT + APP mCherry vs. HTTSA + APP mCherry	-42.67	Yes	**	0.0077	B-C
	Test details	Mean rank 1	Mean rank 2	Mean rank diff,	n1	n2
	wt HTT + mCherry vs. wt HTT + APP mCherry	231.5	165.3	66.17	132	134
	wt HTT + mCherry vs. HTTSA + APP mCherry	231.5	208	23.5	132	136
	wt HTT + APP mCherry vs. HTTSA + APP mCherry	165.3	208	-42.67	134	136
