# Supplementary material for: Presynaptic APP levels and synaptic homeostasis are regulated by Akt phosphorylation of huntingtin
Source: eLife. 2020 May 26;9:e56371. doi: 10.7554/eLife.56371 (PMC7269668; doi:10.7554/eLife.56371)
Supplement: Figure 8—figure supplement 1—source data 1. [file elife-56371-fig8-figsupp1-data1.xlsx]

## Sheet: Feuil1
extra			intra
Table Analyzed	A42 EC		Table Analyzed	A42 IC
Column B	APP AA		Column B	APP AA
vs.	vs,		vs.	vs,
Column A	APP		Column A	APP
Mann Whitney test			Mann Whitney test
P value	0.7376		P value	0.5377
Exact or approximate P value?	Exact		Exact or approximate P value?	Exact
P value summary	ns		P value summary	ns
Significantly different? (P < 0.05)	No		Significantly different? (P < 0.05)	No
One- or two-tailed P value?	Two-tailed		One- or two-tailed P value?	Two-tailed
Sum of ranks in column A,B	203 , 232		Sum of ranks in column A,B	180,5 , 254,5
Mann-Whitney U	96		Mann-Whitney U	89.5
Difference between medians			Difference between medians
Median of column A	160,4, n=13		Median of column A	196,6, n=13
Median of column B	134,1, n=16		Median of column B	208,6, n=16
Difference: Actual	-26.35		Difference: Actual	12
Difference: Hodges-Lehmann	-5.1		Difference: Hodges-Lehmann	13.35
