# Supplementary material for: Presynaptic APP levels and synaptic homeostasis are regulated by Akt phosphorylation of huntingtin
Source: eLife. 2020 May 26;9:e56371. doi: 10.7554/eLife.56371 (PMC7269668; doi:10.7554/eLife.56371)
Supplement: Figure 8—figure supplement 1—source data 2. [file elife-56371-fig8-figsupp1-data2.xlsx]

## Sheet: Feuil1
FigS4C Amyloïd loads
Table Analyzed	4G8						Table Analyzed	OC						Table Analyzed	A11						Table Analyzed	Congo Red
Two-way ANOVA							Two-way ANOVA							Two-way ANOVA							Two-way ANOVA
Source of Variation	% of total variation	P value					Source of Variation	% of total variation	P value					Source of Variation	% of total variation	P value					Source of Variation	% of total variation	P value
Interaction	0.21	0.931					Interaction	1.82	0.5557					Interaction	0.19	0.9512					Interaction	0.09	0.9301
Genotype	0.12	0.772					Genotype	0	0.9904					Genotype	0.23	0.7283					Genotype	0.02	0.8705
ROI	17.62	0.0039					ROI	9.35	0.0552					ROI	1.4	0.6923					ROI	65.12	< 0,0001
Source of Variation	P value summary	Significant?					Source of Variation	P value summary	Significant?					Source of Variation	P value summary	Significant?					Source of Variation	P value summary	Significant?
Interaction	ns	No					Interaction	ns	No					Interaction	ns	No					Interaction	ns	No
Genotype	ns	No					Genotype	ns	No					Genotype	ns	No					Genotype	ns	No
ROI	**	Yes					ROI	ns	No					ROI	ns	No					ROI	***	Yes
Source of Variation	Df	Sum-of-squares	Mean square	F			Source of Variation	Df	Sum-of-squares	Mean square	F			Source of Variation	Df	Sum-of-squares	Mean square	F			Source of Variation	Df	Sum-of-squares	Mean square	F
Interaction	2	5.32	2.66	0.07154			Interaction	2	12.52	6.262	0.5936			Interaction	2	0.8704	0.4352	0.05005			Interaction	2	0.001389	0.0006945	0.07258
Genotype	1	3.151	3.151	0.08475			Genotype	1	0.001537	0.001537	0.0001457			Genotype	1	1.061	1.061	0.122			Genotype	1	0.0002566	0.0002566	0.02681
ROI	2	456	228	6.132			ROI	2	64.33	32.17	3.049			ROI	2	6.441	3.221	0.3704			ROI	2	1.038	0.5192	54.26
Residual	57	2119	37.18				Residual	57	601.3	10.55				Residual	52	452.2	8.696				Residual	56	0.5359	0.009569
Number of missing values	9						Number of missing values	9						Number of missing values	14						Number of missing values	10
Bonferroni posttests							Bonferroni posttests							Bonferroni posttests							Bonferroni posttests
APPPS1 vs APPPS1/HTTSA							APPPS1 vs APPPS1/HTTSA							APPPS1 vs APPPS1/HTTSA							APPPS1 vs APPPS1/HTTSA
ROI	APPPS1	APPPS1/HTTSA	Difference	95% CI of diff,			ROI	APPPS1	APPPS1/HTTSA	Difference	95% CI of diff,			ROI	APPPS1	APPPS1/HTTSA	Difference	95% CI of diff,			ROI	APPPS1	APPPS1/HTTSA	Difference	95% CI of diff,
SM	11.24	10.04	-1.198	-7,831 to 5,435			SM	9.624	10.1	0.4795	-3,053 to 4,012			SM	5.307	4.812	-0.4951	-3,712 to 2,722			SM	0.7757	0.7772	0.001511	-0,1050 to 0,1080
FR	8.079	8.316	0.2369	-6,396 to 6,870			FR	9.872	10.67	0.8011	-2,732 to 4,334			FR	5.78	5.869	0.08875	-3,559 to 3,736			FR	0.6839	0.6663	-0.01763	-0,1261 to 0,09089
HPC	4.249	3.854	-0.3947	-7,027 to 6,238			HPC	8.557	7.306	-1.251	-4,783 to 2,282			HPC	5.901	5.485	-0.4168	-3,634 to 2,800			HPC	0.4629	0.4667	0.003806	-0,1027 to 0,1103
ROI	Difference	t	P value	Summary			ROI	Difference	t	P value	Summary			ROI	Difference	t	P value	Summary			ROI	Difference	t	P value	Summary
SM	-1.198	0.4456	P > 0,05	ns			SM	0.4795	0.3348	P > 0,05	ns			SM	-0.4951	0.3808	P > 0,05	ns			SM	0.001511	0.03502	P > 0,05	ns
FR	0.2369	0.08812	P > 0,05	ns			FR	0.8011	0.5593	P > 0,05	ns			FR	0.08875	0.06019	P > 0,05	ns			FR	-0.01763	0.401	P > 0,05	ns
HPC	-0.3947	0.1468	P > 0,05	ns			HPC	-1.251	0.8732	P > 0,05	ns			HPC	-0.4168	0.3206	P > 0,05	ns			HPC	0.003806	0.08823	P > 0,05	ns
