# Supplementary material for: Presynaptic APP levels and synaptic homeostasis are regulated by Akt phosphorylation of huntingtin
Source: eLife. 2020 May 26;9:e56371. doi: 10.7554/eLife.56371 (PMC7269668; doi:10.7554/eLife.56371)
Supplement: Figure 8—source data 1. [file elife-56371-fig8-data1.xlsx]

## Sheet: Feuil1
Non PSD Fraction			PSD Fraction
Table Analyzed	non PSD (APP/syn)		Table Analyzed	PSD (APP/PSD)
Column B	APP AA		Column B	APPAA
vs.	vs,		vs.	vs,
Column A	APP		Column A	APP
Wilcoxon matched-pairs signed rank test			Wilcoxon matched-pairs signed rank test
P value	0.0273		P value	> 0,9999
Exact or approximate P value?	Exact		Exact or approximate P value?	Exact
P value summary	*		P value summary	ns
Significantly different? (P < 0.05)	Yes		Significantly different? (P < 0.05)	No
One- or two-tailed P value?	Two-tailed		One- or two-tailed P value?	Two-tailed
Sum of positive, negative ranks	4,000 , -41,00		Sum of positive, negative ranks	28,00 , -27,00
Sum of signed ranks (W)	-37		Sum of signed ranks (W)	1
Number of pairs	9		Number of pairs	10
Median of differences			Median of differences
Median	-0.29		Median	-0.185
How effective was the pairing?			How effective was the pairing?
rs (Spearman)	0.4519		rs (Spearman)	0.5879
P value (one tailed)	0.1114		P value (one tailed)	0.0403
P value summary	ns		P value summary	*
Was the pairing significantly effective?	No		Was the pairing significantly effective?	Yes
