# Supplementary material for: Presynaptic APP levels and synaptic homeostasis are regulated by Akt phosphorylation of huntingtin
Source: eLife. 2020 May 26;9:e56371. doi: 10.7554/eLife.56371 (PMC7269668; doi:10.7554/eLife.56371)
Supplement: Figure 8—source data 2. [file elife-56371-fig8-data2.xlsx]

## Sheet: Feuil1
synapse number
Table Analyzed	syn number
							Number of families	1
ANOVA summary							Number of comparisons per family	3
F	204.2						Alpha	0.05
P value	< 0,0001
P value summary	****						Tukey's multiple comparisons test	Mean Diff,	95% CI of diff,	Significant?	Summary
Are differences among means statistically significant? (P < 0.05)	Yes
R square	0.4837						WT vs. APP	12.62	10,73 to 14,51	Yes	****		A-C
							WT vs. APP AA	-1.935	-3,828 to -0,04198	Yes	*		A-D
Brown-Forsythe test							APP vs. APP AA	-14.56	-16,39 to -12,73	Yes	****		C-D
F (DFn, DFd)	33,75 (2, 436)
P value	< 0,0001
P value summary	****						Test details	Mean 1	Mean 2	Mean Diff,	SE of diff,	n1	n2	q	DF
Significantly different standard deviations? (P < 0.05)	Yes
							WT vs. APP	20.21	7.589	12.62	0.8037	134	153	22.21	436
Bartlett's test							WT vs. APP AA	20.21	22.15	-1.935	0.8049	134	152	3.4	436
Bartlett's statistic (corrected)	91.52						APP vs. APP AA	7.589	22.15	-14.56	0.7779	153	152	26.47	436
P value	< 0,0001
P value summary	****
Significantly different standard deviations? (P < 0.05)	Yes
ANOVA table	SS	DF	MS	F (DFn, DFd)	P value
Treatment (between columns)	18846	2	9423	F (2, 436) = 204,2	P < 0,0001
Residual (within columns)	20118	436	46.14
Total	38964	438
Data summary
Number of treatments (columns)	3
Number of values (total)	439
spine size
Table Analyzed	spine size
							Number of families	1
ANOVA summary							Number of comparisons per family	3
F	25.52						Alpha	0.05
P value	< 0,0001
P value summary	****						Tukey's multiple comparisons test	Mean Diff,	95% CI of diff,	Significant?	Summary
Are differences among means statistically significant? (P < 0.05)	Yes
R square	0.06308						WT vs. APP	-82604	-123088 to -42120	Yes	****		A-C
							WT vs. APP AA	29650	-4972 to 64273	No	ns		A-D
Brown-Forsythe test							APP vs. APP AA	112254	75215 to 149293	Yes	****		C-D
F (DFn, DFd)	17,90 (2, 758)
P value	< 0,0001
P value summary	****						Test details	Mean 1	Mean 2	Mean Diff,	SE of diff,	n1	n2	q	DF
Significantly different standard deviations? (P < 0.05)	Yes
							WT vs. APP	185886	268489	-82604	17240	225	182	6.776	758
Bartlett's test							WT vs. APP AA	185886	156235	29650	14744	225	354	2.844	758
Bartlett's statistic (corrected)	240.6						APP vs. APP AA	268489	156235	112254	15773	182	354	10.07	758
P value	< 0,0001
P value summary	****
Significantly different standard deviations? (P < 0.05)	Yes
ANOVA table	SS	DF	MS	F (DFn, DFd)	P value
Treatment (between columns)	1526000000000	2	763000000000	F (2, 758) = 25,52	P < 0,0001
Residual (within columns)	22670000000000	758	29900000000
Total	24190000000000	760
Data summary
Number of treatments (columns)	3
Number of values (total)	761
