# Supplementary material for: Presynaptic APP levels and synaptic homeostasis are regulated by Akt phosphorylation of huntingtin
Source: eLife. 2020 May 26;9:e56371. doi: 10.7554/eLife.56371 (PMC7269668; doi:10.7554/eLife.56371)
Supplement: Figure 9—figure supplement 1—source data 1. [file elife-56371-fig9-figsupp1-data1.xlsx]

## Sheet: Feuil1
FigS5A
Table Analyzed	Distance moved
One-way analysis of variance
P value	0.4835
P value summary	ns
Are means signif. different? (P < 0.05)	No
Number of groups	3
F	0.7459
R square	0.05059
Bartlett's test for equal variances
Bartlett's statistic (corrected)	13.35
P value	0.0013
P value summary	**
Do the variances differ signif. (P < 0.05)	Yes
ANOVA Table	SS	df	MS
Treatment (between columns)	45.08	2	22.54
Residual (within columns)	846.2	28	30.22
Total	891.2	30
Tukey's Multiple Comparison Test	Mean Diff,	q	Significant? P < 0,05?	Summary	95% CI of diff
WT vs APPPS1	-2.829	1.619	No	ns	-8,946 to 3,289
WT vs APPPS1/HTTSA	-0.3941	0.2378	No	ns	-6,198 to 5,409
APPPS1 vs APPPS1/HTTSA	2.434	1.393	No	ns	-3,683 to 8,552
