# Supplementary material for: Presynaptic APP levels and synaptic homeostasis are regulated by Akt phosphorylation of huntingtin
Source: eLife. 2020 May 26;9:e56371. doi: 10.7554/eLife.56371 (PMC7269668; doi:10.7554/eLife.56371)
Supplement: Figure 9—figure supplement 1—source data 2. [file elife-56371-fig9-figsupp1-data2.xlsx]

## Sheet: Feuil1
FigS5B Ratio
Table Analyzed	Ratio Periph/center
One-way analysis of variance
P value	0.2113
P value summary	ns
Are means signif. different? (P < 0.05)	No
Number of groups	3
F	1.644
R square	0.1051
Bartlett's test for equal variances
Bartlett's statistic (corrected)	20.87
P value	< 0,0001
P value summary	***
Do the variances differ signif. (P < 0.05)	Yes
ANOVA Table	SS	df	MS
Treatment (between columns)	144.1	2	72.04
Residual (within columns)	1227	28	43.81
Total	1371	30
Tukey's Multiple Comparison Test	Mean Diff,	q	Significant? P < 0,05?	Summary	95% CI of diff
WT vs APPPS1	-4.556	2.165	No	ns	-11,92 to 2,810
WT vs APPPS1/HTTSA	0.3636	0.1822	No	ns	-6,624 to 7,351
APPPS1 vs APPPS1/HTTSA	4.919	2.338	No	ns	-2,447 to 12,28
