# Supplementary material for: Presynaptic APP levels and synaptic homeostasis are regulated by Akt phosphorylation of huntingtin
Source: eLife. 2020 May 26;9:e56371. doi: 10.7554/eLife.56371 (PMC7269668; doi:10.7554/eLife.56371)
Supplement: Figure 9—source data 1. [file elife-56371-fig9-data1.xlsx]

## Sheet: Feuil1
Fig 9A. Spatial learning
							NARRATIVE RESULTS
							Source of Variation	DF	Sum of Squares	Mean Square
Table Analyzed	MWM						Interaction	20	1982	99.10
							Time	10	19634	1963
Two-way RM ANOVA	Matching by cols						Genotype	2	16040	8020
							Subjects (matching)	26	17938	689.9
Source of Variation	% of total variation	P value					Residual (Error)	260	21002	80.78
Interaction	2.49	0.2318					Total	318	79460
Time	24.71	< 0,0001
Genotype	20.19	0.0002
Subjects (matching)	22.575	< 0,0001					Does Time have the same effect at all values of Genotype?
							Interaction accounts for 2.49% of the total variance.
Source of Variation	P value summary	Significant?					F = 1.23. DFn=20 DFd=260
Interaction	ns	No					The P value = 0.2318
Time	***	Yes					If there is no interaction overall, there is a 23% chance of randomly observing so much
Genotype	***	Yes					interaction in an experiment of this size. The interaction is considered not significant.
Subjects (matching)	***	Yes
Source of Variation	Df	Sum-of-squares	Mean square	F			Does Genotype affect the result? (Are the curves different?)
Interaction	20	1982	99.1	1.227			Genotype accounts for 20.19% of the total variance (after adjusting for matching).
Time	10	19634	1963	24.31			F = 11.62. DFn=2 DFd=26
Genotype	2	16040	8020	11.62			The P value = 0.0002
Subjects (matching)	26	17938	689.9	8.541			If Genotype has no effect overall, there is a 0.025% chance of randomly observing an
Residual	260	21002	80.78				effect this big (or bigger) in an experiment of this size. The effect is considered extremely significant.
Number of missing values	0
							Does Time affect the result? (Are the curves horizontal?)
Bonferroni posttests							Time accounts for 24.71% of the total variance (after adjusting for matching).
							F = 24.31. DFn=10 DFd=260
WT vs APPPS1							The P value is <0.0001
Genotype	WT	APPPS1	Difference	95% CI of diff,			If Time has no effect overall, there is a less than 0.01% chance of randomly observing an
day1	34.55	45.03	10.47	-7,594 to 28,54			effect this big (or bigger) in an experiment of this size. The effect is considered extremely significant.
day2	20.67	36.47	15.8	-2,273 to 33,86
day3	14.95	32.91	17.95	-0,1147 to 36,02
day4	18.11	30.77	12.67	-5,402 to 30,74			Was the matching effective?
day5	8.877	26.41	17.53	-0,5391 to 35,60			F = 8.54. DFn=26 DFd=260
day6	10.37	29.2	18.83	0,7600 to 36,90			The P value is <0.0001
day7	9.024	29.77	20.74	2,673 to 38,81			If matching were not effective overall, there is a less than 0.01% chance of randomly observing an
day8	7.907	27.45	19.54	1,476 to 37,61			effect this big (or bigger) in an experiment of this size. The effect is considered extremely significant
day9	2.716	28.31	25.6	7,527 to 43,66
day10	6.695	24.93	18.24	0,1711 to 36,31
day11	5.949	26.79	20.84	2,771 to 38,91
Genotype	Difference	t	P value	Summary
day1	10.47	1.857	P > 0,05	ns
day2	15.8	2.8	P > 0,05	ns
day3	17.95	3.182	P < 0,05	*
day4	12.67	2.245	P > 0,05	ns
day5	17.53	3.107	P < 0,05	*
day6	18.83	3.337	P < 0,05	*
day7	20.74	3.676	P<0,01	**
day8	19.54	3.464	P<0,01	**
day9	25.6	4.537	P<0,001	***
day10	18.24	3.233	P < 0,05	*
day11	20.84	3.694	P<0,01	**
WT vs APPPS1/HTTSA
Genotype	WT	APPPS1/HTTSA	Difference	95% CI of diff,
day1	34.55	48.7	14.15	-1,783 to 30,09
day2	20.67	34.86	14.19	-1,744 to 30,13
day3	14.95	29.51	14.55	-1,381 to 30,49
day4	18.11	23.27	5.166	-10,77 to 21,10
day5	8.877	22.61	13.74	-2,198 to 29,67
day6	10.37	19.33	8.961	-6,974 to 24,90
day7	9.024	14.36	5.331	-10,60 to 21,27
day8	7.907	13.68	5.774	-10,16 to 21,71
day9	2.716	15.92	13.2	-2,733 to 29,14
day10	6.695	14.5	7.805	-8,130 to 23,74
day11	5.949	15.18	9.235	-6,700 to 25,17
Genotype	Difference	t	P value	Summary
day1	14.15	2.844	P > 0,05	ns
day2	14.19	2.852	P > 0,05	ns
day3	14.55	2.925	P < 0,05	*
day4	5.166	1.038	P > 0,05	ns
day5	13.74	2.761	P > 0,05	ns
day6	8.961	1.801	P > 0,05	ns
day7	5.331	1.072	P > 0,05	ns
day8	5.774	1.16	P > 0,05	ns
day9	13.2	2.653	P > 0,05	ns
day10	7.805	1.569	P > 0,05	ns
day11	9.235	1.856	P > 0,05	ns
APPPS1 vs APPPS1/HTTSA
Genotype	APPPS1	APPPS1/HTTSA	Difference	95% CI of diff,
day1	45.03	48.7	3.678	-14,39 to 21,75
day2	36.47	34.86	-1.605	-19,67 to 16,46
day3	32.91	29.51	-3.4	-21,47 to 14,67
day4	30.77	23.27	-7.5	-25,57 to 10,57
day5	26.41	22.61	-3.793	-21,86 to 14,28
day6	29.2	19.33	-9.868	-27,94 to 8,201
day7	29.77	14.36	-15.41	-33,48 to 2,659
day8	27.45	13.68	-13.77	-31,84 to 4,298
day9	28.31	15.92	-12.39	-30,46 to 5,675
day10	24.93	14.5	-10.43	-28,50 to 7,634
day11	26.79	15.18	-11.6	-29,67 to 6,464
Genotype	Difference	t	P value	Summary
day1	3.678	0.6519	P > 0,05	ns
day2	-1.605	0.2845	P > 0,05	ns
day3	-3.4	0.6026	P > 0,05	ns
day4	-7.5	1.329	P > 0,05	ns
day5	-3.793	0.6722	P > 0,05	ns
day6	-9.868	1.749	P > 0,05	ns
day7	-15.41	2.731	P > 0,05	ns
day8	-13.77	2.441	P > 0,05	ns
day9	-12.39	2.197	P > 0,05	ns
day10	-10.43	1.85	P > 0,05	ns
day11	-11.6	2.057	P > 0,05	ns
