# Supplementary material for: Presynaptic APP levels and synaptic homeostasis are regulated by Akt phosphorylation of huntingtin
Source: eLife. 2020 May 26;9:e56371. doi: 10.7554/eLife.56371 (PMC7269668; doi:10.7554/eLife.56371)
Supplement: Figure 9—source data 2. [file elife-56371-fig9-data2.xlsx]

## Sheet: Feuil1
Fig 9B Cumulative CIPL
Table Analyzed	Early phase
One-way analysis of variance
P value	0.0004
P value summary	***
Are means signif. different? (P < 0.05)	Yes
Number of groups	3
F	10.81
R square	0.4539
Bartlett's test for equal variances
Bartlett's statistic (corrected)	5.291
P value	0.071
P value summary	ns
Do the variances differ signif. (P < 0.05)	No
ANOVA Table	SS	df	MS
Treatment (between columns)	1243	2	621.3
Residual (within columns)	1495	26	57.49
Total	2737	28
Tukey's Multiple Comparison Test	Mean Diff,	q	Significant? P < 0,05?	Summary	95% CI of diff
WT vs APPPS1	-14.88	5.742	Yes	**	-24,00 to -5,768
WT vs APPPS1/HTTSA	-12.36	5.406	Yes	**	-20,40 to -4,320
APPPS1 vs APPPS1/HTTSA	2.524	0.9737	No	ns	-6,592 to 11,64
Table Analyzed	Late phase
One-way analysis of variance
P value	0.0006
P value summary	***
Are means signif. different? (P < 0.05)	Yes
Number of groups	3
F	9.915
R square	0.4327
Bartlett's test for equal variances
Bartlett's statistic (corrected)	19.05
P value	< 0,0001
P value summary	***
Do the variances differ signif. (P < 0.05)	Yes
ANOVA Table	SS	df	MS
Treatment (between columns)	1822	2	910.9
Residual (within columns)	2388	26	91.86
Total	4210	28
Tukey's Multiple Comparison Test	Mean Diff,	q	Significant? P < 0,05?	Summary	95% CI of diff
WT vs APPPS1	-20.63	6.296	Yes	***	-32,15 to -9,108
WT vs APPPS1/HTTSA	-8.385	2.901	No	ns	-18,55 to 1,778
APPPS1 vs APPPS1/HTTSA	12.25	3.737	Yes	*	0,7234 to 23,77
