# Supplementary material for: Presynaptic APP levels and synaptic homeostasis are regulated by Akt phosphorylation of huntingtin
Source: eLife. 2020 May 26;9:e56371. doi: 10.7554/eLife.56371 (PMC7269668; doi:10.7554/eLife.56371)
Supplement: Figure 9—source data 3. [file elife-56371-fig9-data3.xlsx]

## Sheet: Feuil1
Fig 9C Spatial memory
Probe
	WT	APPPS1	APPPS1/HTTSA
Number of values	11	7	11
Minimum	43	24	23
25% Percentile	44	26	25
Median	53	31	36
75% Percentile	58	46	55
Maximum	70	59	68
Mean	52.18	35.71	39.73
Std. Deviation	8.897	12.78	15.44
Std. Error	2.683	4.829	4.656
Lower 95% CI of mean	46.2	23.9	29.35
Upper 95% CI of mean	58.16	47.53	50.1
One sample t test
Theoretical mean	25	25	25
Actual mean	52.18	35.71	39.73
Discrepancy	-27.18	-10.71	-14.73
95% CI of discrepancy	21,20 to 33,16	-1,102 to 22,53	4,355 to 25,10
t, df	t=10,13 df=10	t=2,219 df=6	t=3,163 df=10
P value (two tailed)	< 0,0001	0.0683	0.0101
Significant (alpha=0.05)?	Yes	No	Yes
Sum	574	250	437
