# Supplementary material for: Presynaptic APP levels and synaptic homeostasis are regulated by Akt phosphorylation of huntingtin
Source: eLife. 2020 May 26;9:e56371. doi: 10.7554/eLife.56371 (PMC7269668; doi:10.7554/eLife.56371)
Supplement: Figure 9—source data 4. [file elife-56371-fig9-data4.xlsx]

## Sheet: Feuil1
Fig 9D Non spatial memory
	WT	APPPS1	APPPS1/HTTSA
Number of values	24	18	21
Minimum	41.3	27	31.8
25% Percentile	51.5	43.28	49.9
Median	60.75	53.85	61
75% Percentile	76.35	64.13	73.95
Maximum	91.7	87.8	82.9
Mean	63.28	54.97	60.77
Std. Deviation	14.37	14.86	14.3
Std. Error	2.934	3.503	3.12
Lower 95% CI of mean	57.21	47.58	54.26
Upper 95% CI of mean	69.35	62.36	67.27
One sample t test
Theoretical mean	50	50	50
Actual mean	63.28	54.97	60.77
Discrepancy	-13.28	-4.972	-10.77
95% CI of discrepancy	7,209 to 19,35	-2,419 to 12,36	4,259 to 17,27
t, df	t=4,526 df=23	t=1,419 df=17	t=3,451 df=20
P value (two tailed)	0.0002	0.1739	0.0025
Significant (alpha=0.05)?	Yes	No	Yes
Sum	1519	989.5	1276
